# Supplementary material for: Photosynthetic production of ethanol from carbon dioxide in genetically engineered cyanobacteria
Source: Royal Society of Chemistry journal article supplement (doi:10.1039/c2ee22675h), 2012-01-01
Supplement: c2ee22675h.pdf [file c2ee22675h.pdf]

## **Supplementary information**

# **Photosynthetic production of ethanol from carbon dioxide in genetically engineered cyanobacteria**

Zhengxu Gao<sup>a,b,#</sup>, Hui Zhao<sup>a,#</sup>, Zhimin Li<sup>a</sup>, Xiaoming Tan<sup>a</sup> and Xuefeng Lu<sup>\*a</sup>

<sup>1</sup>Key Laboratory of Biofuels, Shandong Provincial Key Laboratory of Energy Genetics, Qingdao Institute of Bioenergy and Bioprocess Technology, Chinese Academy of Sciences, No. 189 Songling Road, Qingdao 266101, China

<sup>2</sup>Graduate School of Chinese Academy of Sciences, Beijing 100049, China

## **Contents**

**Table S1 Page2**

**Table S2 Page3**

**Table S3 Page5**

**Table S4 Page6**

**Figure S1 Page7**

**Figure S2 Page10**

**Figure S3 Page11**

**Figure S4 Page12**

**References Page13**

**Table S1** Strains and plasmid used and constructed in this study

| <b>Strain</b>  | <b>Relevant genotype</b>                                                                                                    | <b>Reference</b> |
|----------------|-----------------------------------------------------------------------------------------------------------------------------|------------------|
| PCC6803        | <i>Synechocystis</i> sp.PCC6803 wild type                                                                                   | 1                |
| PCC7120        | <i>Anabaena</i> sp. PCC 7120 wild type                                                                                      | 1                |
| PCC7942        | <i>Synechococcus</i> sp.PCC7942 wild type                                                                                   | 1                |
| Syn-LY2        | <i>slr0168::Omega</i>                                                                                                       | 1                |
| Syn-XT43       | <i>slr0168::Omega P<sub>rbc</sub> pdc</i> and <i>adh II</i>                                                                 | This study       |
| Syn-ZG25       | <i>slr0168:: Omega P<sub>rbc</sub> pdc</i> and <i>slr1192</i>                                                               | This study       |
| Syn-HZ23       | <i>slr9394::Kan P<sub>rbc</sub> pdc</i> and <i>slr1192</i>                                                                  | This study       |
| Syn-HZ24       | <i>slr9394::Kan P<sub>rbc</sub> pdc</i> and <i>slr1192</i><br><i>slr0168:: Omega P<sub>rbc</sub> pdc</i> and <i>slr1192</i> | This study       |
| <b>Plasmid</b> | <b>Relevant properties</b>                                                                                                  |                  |
| pMD18-T        | AP <sup>r</sup> ; cloning vector                                                                                            | Takara           |
| pET28-b        | Km <sup>r</sup> ; containing 6×His tag                                                                                      | Novagen          |
| pFQ20          | Ap <sup>r</sup> Sp <sup>r</sup> ; <i>slr0168</i> targeting vector; Omega                                                    | 1                |
| pMSD15         | Cm <sup>r</sup> ; pACYA184 derivative                                                                                       | 2,3              |
| pXT5           | Km <sup>r</sup> ; P <sub>T7</sub> :: <i>adh II</i>                                                                          | This study       |
| pXT113A        | Km <sup>r</sup> ; P <sub>T7</sub> :: <i>slr1192</i>                                                                         | This study       |
| pZG35          | Km <sup>r</sup> ; P <sub>T7</sub> :: Synpcc7942_0459                                                                        | This study       |
| pZG36          | Km <sup>r</sup> ; P <sub>T7</sub> :: <i>all0879</i>                                                                         | This study       |
| pZG37          | Km <sup>r</sup> ; P <sub>T7</sub> :: <i>alr0895</i>                                                                         | This study       |
| pZG38          | Km <sup>r</sup> ; P <sub>T7</sub> :: <i>alr0897</i>                                                                         | This study       |
| pZG39          | Km <sup>r</sup> ; P <sub>T7</sub> :: <i>slr0942</i>                                                                         | This study       |
| pZG40          | Km <sup>r</sup> ; P <sub>T7</sub> :: <i>sll0990</i>                                                                         | This study       |
| pZG41          | Km <sup>r</sup> ; P <sub>T7</sub> :: <i>all2810</i>                                                                         | This study       |
| pZG42          | Km <sup>r</sup> ; P <sub>T7</sub> :: <i>all5334</i>                                                                         | This study       |
| pZG62          | Cm <sup>r</sup> Sp <sup>r</sup> ; P <sub>T7</sub> :: <i>pdc</i>                                                             | This study       |
| pZG63          | Km <sup>r</sup> ; P <sub>T7</sub> :: <i>slr1192</i> , <i>alr0895</i>                                                        | This study       |
| pZG64          | Km <sup>r</sup> ; P <sub>T7</sub> :: <i>adh II</i> , <i>slr1192</i>                                                         | This study       |
| pZG65          | Km <sup>r</sup> ; P <sub>T7</sub> :: <i>alr0895</i> , <i>adh II</i>                                                         | This study       |
| pZG66          | Km <sup>r</sup> ; P <sub>T7</sub> :: <i>alr0895</i> , <i>adh II</i> , <i>slr1192</i>                                        | This study       |
| pZG25          | Ap <sup>r</sup> Sp <sup>r</sup> ; <i>slr0168</i> targeting; P <sub>rbc</sub> :: <i>pdc</i> , <i>slr1192</i>                 | This study       |
| pHZ22          | Ap <sup>r</sup> Km <sup>r</sup> ; containing <i>slr9394</i> homologous arm                                                  | This study       |
| pHZ23          | Ap <sup>r</sup> Km <sup>r</sup> ; <i>slr9394</i> targeting; P <sub>rbc</sub> :: <i>pdc</i> , <i>slr1192</i>                 | This study       |

**Table S2** Oligonucleotide primers used in this study

| <b>Primers</b> | <b>Sequence (5'→3')</b>                |
|----------------|----------------------------------------|
| pdcF           | GGCATATGAGTTATACTGTCGGTACCTATTTAGCGG   |
| pdcR           | GGTACTAGTCTAGAGGAGCTTGTTAACAGGCT       |
| 1192F          | TACATATGATTAAAGCCTACGCTGCCCT           |
| 1192R          | TTTCTCGAGCTAATTTTTACTATGGCTGAGCACTAC   |
| 93F            | GGGGACCATCCTGACTACACGG                 |
| 93R            | TTCCAATGCCATGGGTTGGGAT                 |
| 94F            | GTAGCCATGGTAGCTATGTCACCG               |
| 94R            | TGTTGATGGTGGGTATCGTGGTG                |
| rbcL-T         | TAATAACTGTCTCTGGGGCGACGG               |
| 0168-1         | ACCTCTCCACGCTGAATTAG                   |
| 0168-2         | TTCCAGGCCACATTGTTGTC                   |
| dc92F          | CTGGATGAACCCTTTACCCGCTTA               |
| dc92R          | TTTCTCGAGCTAATTTTTACTATGGCTGAGCACTAC   |
| adhF           | GGCATATGGCTTCTTCAACTTTTTATATTCCTTTCGTC |
| adhR           | GCGCTCGAG TTAGAAAGCGCTCAGGA            |
| 0459F          | TACATATGAAATCACGCGCTGCGAT              |
| 0459R          | TTAAAAGGTGATGACGGTGCGAAT               |
| 0879F          | GACATATGCGCGCCATGATTTTAGA              |
| 0879R          | ATCTCGAGTCACTTCATCACTAAAACG            |
| 0895F          | AGCATATGAAAGCAGTCTGCTGG                |
| 0895R          | ATCTCGAGTTACGGTTTGAGTACAAC             |
| 0897F          | TACATATGAAAGCAGTTTGCTGGC               |
| 0897R          | ATCTCGAGTTAGGGTTTGAGTACAAC             |
| 0942F          | GCCATATGCAGAGTTTCAATAGG                |
| 0942R          | AGCTCGAGTTAAATTCATCCCATAGG             |
| 0990F          | TACATATGAAATCCCGTGCCGCC                |
| 0990R          | ATCTCGAGTTAGTAGTGGATCACACT             |
| 2810F          | CACATATGGAAGTGAAAGCAGCAA               |
| 2810R          | CTCTCGAGTTAAAAGTCACCACACT              |

---

5334F                   GCCATATGAAAGCAGTTGTTTTT

5334R                   ACCTCGAGCTAAACATTAGCTAAAGC

---

**Table S3** Nine alcohol dehydrogenases from three different cyanobacteria

| <b>Plasmid</b> | <b>Gene name</b> | <b>Cyanobacteria type</b>        |
|----------------|------------------|----------------------------------|
| pXT113A        | <i>slr1192</i>   | <i>Synechocystis</i> sp. PCC6803 |
| pZG35          | Synpcc7942_0459  | <i>Synechococcus</i> sp. PCC7942 |
| pZG36          | <i>all0879</i>   | <i>Anabaena</i> sp. PCC7120      |
| pZG37          | <i>alr0895</i>   | <i>Anabaena</i> sp. PCC7120      |
| pZG38          | <i>alr0897</i>   | <i>Anabaena</i> sp. PCC7120      |
| pZG39          | <i>slr0942</i>   | <i>Synechocystis</i> sp. PCC6803 |
| pZG40          | <i>sll0990</i>   | <i>Synechocystis</i> sp. PCC6803 |
| pZG41          | <i>all2810</i>   | <i>Anabaena</i> sp. PCC7120      |
| pZG42          | <i>all5334</i>   | <i>Anabaena</i> sp. PCC7120      |

**Table S4** The doubling time of *E. coli* strains with expression of pyruvate decarboxylase and different alcohol dehydrogenases

| Strain                         | Genotype                         | Doubling time (g/h) | Final OD <sub>600</sub> |
|--------------------------------|----------------------------------|---------------------|-------------------------|
| <i>E. coli</i> (pZG62)         | <i>pdc</i>                       | 3.54±0.38           | 0.94                    |
| <i>E. coli</i> (pZG62+pXT5)    | <i>pdc+adhII</i>                 | 2.91±0.27           | 2.02                    |
| <i>E. coli</i> (pZG62+pXT113A) | <i>pdc+slr1192</i>               | 2.91±0.30           | 2.67                    |
| <i>E. coli</i> (pZG62+pZG35)   | <i>pdc+Synpcc7942_0459</i>       | 3.24±0.08           | 2.22                    |
| <i>E. coli</i> (pZG62+ pZG36)  | <i>pdc+all0879</i>               | 3.05±0.35           | 2.53                    |
| <i>E. coli</i> (pZG62+ pZG38)  | <i>pdc+alr0897</i>               | 2.54±0.37           | 2.43                    |
| <i>E. coli</i> (pZG62+ pZG42)  | <i>pdc+all5334</i>               | 2.68±0.14           | 2.49                    |
| <i>E. coli</i> (pZG62+ pZG37)  | <i>pdc+alr0895</i>               | 3.16±0.22           | 2.65                    |
| <i>E. coli</i> (pZG62+ pZG39)  | <i>pdc+slr0942</i>               | 2.82±0.29           | 3.18                    |
| <i>E. coli</i> (pZG62+ pZG40)  | <i>pdc+sll0990</i>               | 3.41±0.16           | 2.27                    |
| <i>E. coli</i> (pZG62+ pZG41)  | <i>pdc+all2810</i>               | 3.08±0.39           | 2.43                    |
| <i>E. coli</i> (pZG62+ pZG63)  | <i>pdc+alr0895+slr1192</i>       | 2.65±0.30           | 2.53                    |
| <i>E. coli</i> (pZG62+ pZG64)  | <i>pdc+adhII+slr1192</i>         | 3.24±0.27           | 2.66                    |
| <i>E. coli</i> (pZG62+ pZG65)  | <i>pdc+adhII+alr0895</i>         | 2.64±0.21           | 2.25                    |
| <i>E. coli</i> (pZG62+ pZG66)  | <i>pdc+adhII+alr0895+slr1192</i> | 2.84±0.34           | 2.00                    |

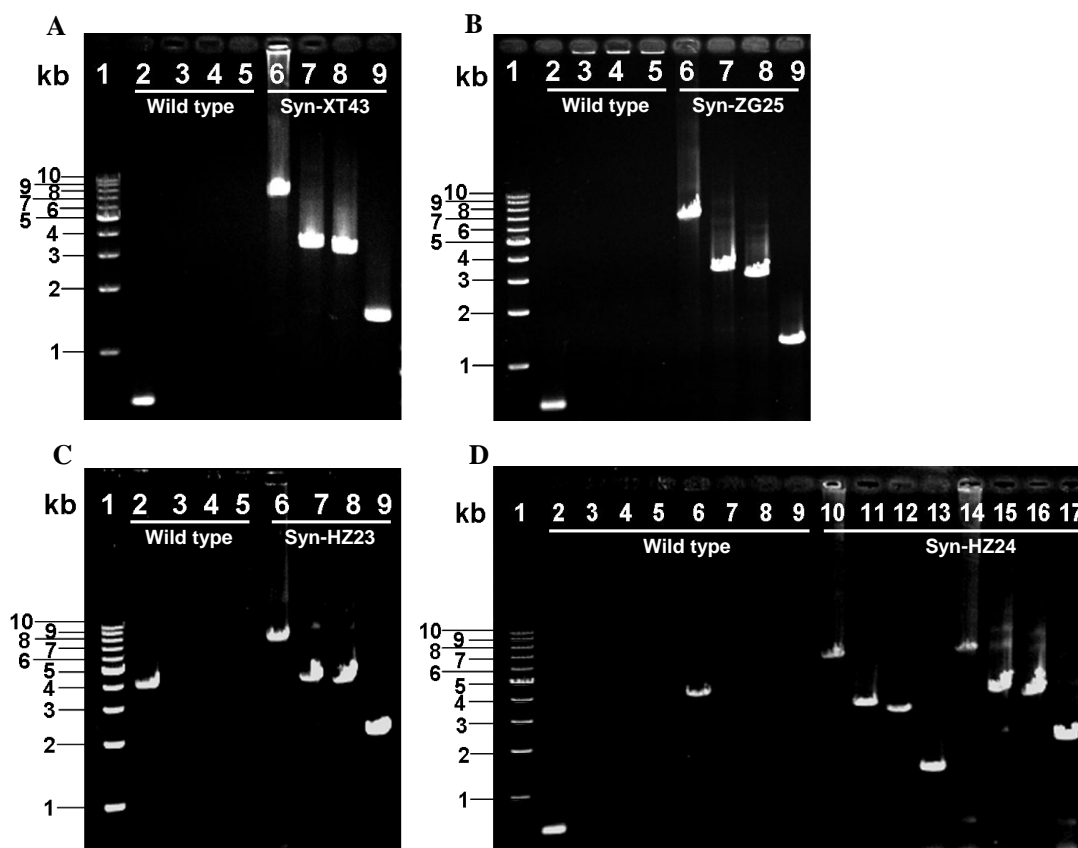

**Figure S1** PCR Identification of the genotype of four ethanol producing strains. The primers used in this section were listed in Table S2.

A) Genotype analysis of Syn-XT43. Lane 1: DNA Ladder. Lane 2-5: wild type DNA was used as the template in PCR. Lane 6-9: the genome DNA of Syn-XT43 was used as the template. Primers 0168-1 and 0168-2, which are specific to the N- and C-terminal of *slr0168* locus respectively, were used in lane 2 and 6. This result indicated the expression cassette was inserted into the *slr0168* site of the genome with an approximate length of 7,500 bp, and the mutant Syn-XT43 was completely segregated. Primers *rbcL-T* (specific to *P<sub>rbc</sub>* promoter) and 0168-2 (specific to the *slr0168* C-terminal) were used in lane 3 and 7. Primers *pdcF* (specific to the N-terminal of *pdc* gene) and 0168-2 (specific to the *slr0168* C-terminal) were used in lane 4 and 8. Primers *adhF* (specific to the N-terminal of *adhII* gene) and 0168-2 (specific to the *slr0168* C-terminal) were used in lane 5 and 9. These results indicated the *pdc* and *adh II* expression cassette was successfully inserted into the *slr0168* site of the genome in the order of *P<sub>rbc</sub>*, *pdc* and *adhII*.

- B) Genotype analysis of Syn-ZG25. Lane1: DNA Ladder. Lane 2-5: wild type DNA was used as the template. Lane 6-9: the genome DNA of Syn-ZG25 was used as the template. Primers 0168-1 and 0168-2 were used in lane 2 and 6. This result indicated the expression cassette was inserted into the *slr0168* site of the genome with an approximate length of 7,300 bp, and the mutant Syn-ZG25 was completely segregated. Primers *rbcL-T* and 0168-2 were used in lane 3 and 7. Primers *pdxF* and 0168-2 were used in lane 4 and 8. Primers 1192F (specific to the N-terminal of *slr1192* gene) and 0168-2 were used in lane 5 and 9. These PCR results indicated the *pdxF* and *slr1192* expression cassette was successfully inserted into the *slr0168* site of the genome in the order of  $P_{rbc}$ , *pdxF* and *slr1192*.
- C) Genotype analysis of Syn-HZ23. Lane1: DNA Ladder. Lane 2-5: wild type DNA was used as the template. Lane 6-9: the genome DNA of Syn-HZ23 was used as the template. Primers 93F and 94R, which are specific to the N- and C-terminal of *slr9394* (or *phaAB*) locus respectively, were used in lane 2 and 6. This result indicated the expression cassette was completely inserted into the *phaAB* site of the genome with an approximate length of 8,000 bp, and the mutant Syn-HZ23 was completely segregated. Primers *rbcL-T* and 94R were used in lane 3 and 7. Primers *pdxF* and 94R were used in lane 4 and 8. Primers 1192F and 94R were used in lane 5 and 9. These PCR results indicated the *pdxF* and *slr1192* expression cassette was successfully inserted into the *phaAB* site of the genome in the order of  $P_{rbc}$ , *pdxF* and *slr1192*.
- D) Genotype analysis of Syn-HZ24. Lane1: DNA Ladder. Lane 2-9: wild type DNA was used as the template. Lane 10-17: the genome DNA of Syn-HZ24 was used as the template. Primers 0168-1 and 0168-2 were used in lane 2 and 10. Primers *rbcL-T* and 0168-2 were used in lane 3 and 11. Primers *pdxF* and 0168-2 were used in lane 4 and 12. Primers 1192F and 0168-2 were used in lane 5 and 13. These PCR result indicated the *pdxF* and *slr1192* expression cassette was completely inserted into the *slr0168* site of the genome in the order of  $P_{rbc}$ , *pdxF* and *slr1192*. Primers 93F and 94R were used in lane 6 and 14. Primers *rbcL-T* and 94R were used in lane 7 and 15. Primers *pdxF* and 94R were used in lane 8 and 16.



Primers 1192F and 94R were used in lane 9 and 17. And these PCR result indicated the *pdc* and *slr1192* expression cassette was completely inserted into the *phaAB* site of the genome in the order of  $P_{rbc}$ , *pdc* and *slr1192*.

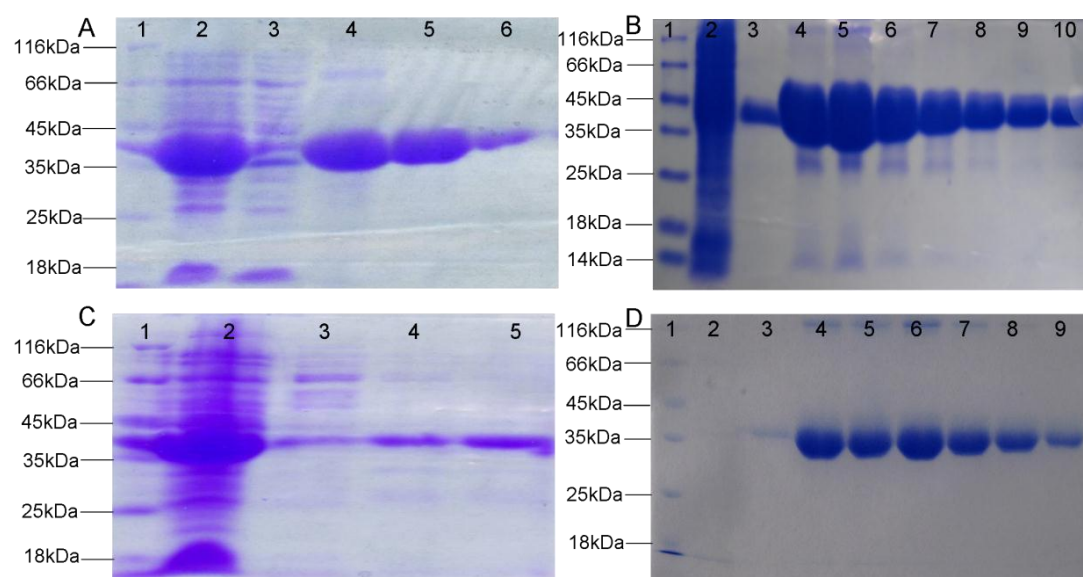

**Figure S2** The SDS-PAGE gel of *adh II*, *slr1192*, *all0879* and Synpcc7942\_0459 purification. (A) The gel of *adh II*, lane 1: protein marker, lane 2: crude extract, lane 3: the protein through the Ni-NTA resin, lane 4-6: the target protein eluted by Tris buffer containing 100mM iminazole (B) The gel of *slr1192*, lane 1: protein marker, lane 2: crude extract, lane 3-10: the protein eluted by Tris buffer containing 250 mM iminazole (C) The gel of *all0879*, lane1: protein marker, lane 2: crude extract, lane 4 and 5: the target protein eluted by Tris buffer containing 100 mM iminazole (D) The gel of Synpcc7942\_0459, lane 1: protein marker, lane 2-9: the target protein eluted by Tris buffer containing 250mM iminazole.

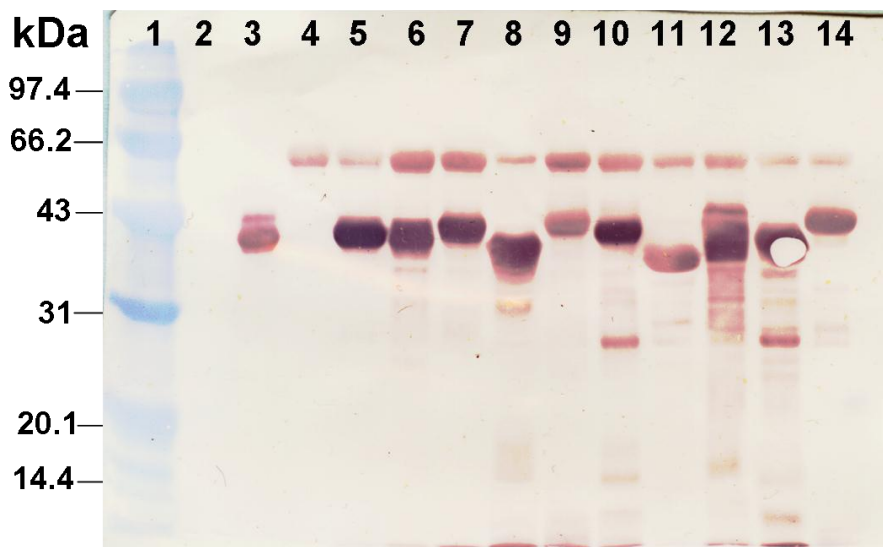

**Figure S3** Western blot analysis of protein expression in *E. coli* mutants with heterologous overexpression of pyruvate decarboxylase from *Zymomonas mobilis* and different alcohol dehydrogenases.

Lane 1: protein marker. Lane 2: the total proteins in wild type *E. coli* as a negative control. Lane 3: the purified alcohol dehydrogenase (*slr1192*) from *Synechocystis* sp. PCC6803 as a positive control. Lane 4: the purified pyruvate decarboxylase (*pdc*) from *Zymomonas mobilis* as another positive control. Lane 5 through lane 14 showed the results of the total protein extracts from *E. coli* mutant harboring *pdc* and *adh II* genes (lane 5); *pdc* and *slr1192* genes (lane 6); *pdc* and Synpcc7942\_0459 genes (lane 7); *pdc* and *all0879* genes (lane 8); *pdc* and *alr0895* genes (lane 9); *pdc* and *alr0897* genes (lane 10); *pdc* and *slr0942* genes (lane 11); *pdc* and *sll0990* genes (lane 12); *pdc* and *all2810* genes (lane 13); *pdc* and *all5334* genes (lane 14), respectively.

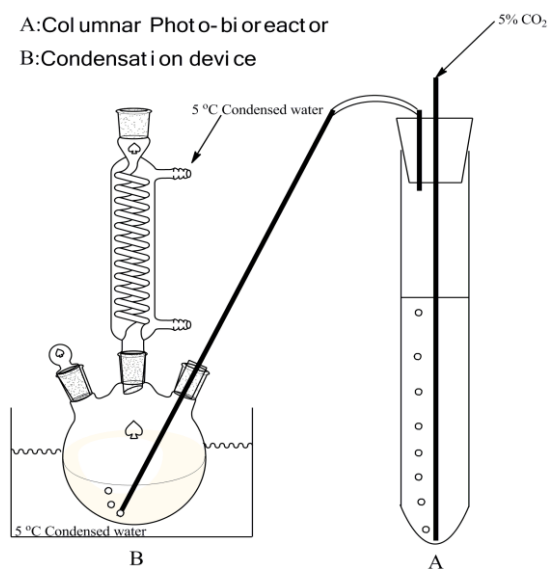

**Figure S4** The column photo-bioreactor (A) and condensation device (B) used for exact determination of the ethanol production in cyanobacteria.

## References

1. X. Tan, L. Yao, Q. Gao, W. Wang, F. Qi and X. Lu, *Metab Eng*, 2011, **13**, 169-176.
2. Y. Duan, Z. Zhu, K. Cai, X. Tan and X. Lu, *PLoS One*, 2011, **6**, e20265.
3. X. Lu, H. Vora and C. Khosla, *Metab Eng*, 2008, **10**, 333-339.
